# 1 Identification of neutralizing human monoclonal antibodies from Italian Covid- 2 19 convalescent patients

3  
4 Emanuele Andreano<sup>1†</sup>, Emanuele Nicastrì<sup>4†</sup>, Ida Paciello<sup>1</sup>, Piero Pileri<sup>1</sup>, Noemi Manganaro<sup>1</sup>, Giulia  
5 Piccini<sup>2</sup>, Alessandro Manenti<sup>2,3</sup>, Elisa Pantano<sup>1</sup>, Anna Kabanova<sup>1,11</sup>, Marco Troisi<sup>1,9</sup>, Fabiola  
6 Vacca<sup>1,9</sup>, Dario Cardamone<sup>1,10</sup>, Concetta De Santi<sup>1</sup>, Chiara Agrati<sup>4</sup>, Maria Rosaria Capobianchi<sup>4</sup>,  
7 Concetta Castilletti<sup>4</sup>, Arianna Emiliozzi<sup>5,6</sup>, Massimiliano Fabbiani<sup>6</sup>, Francesca Montagnani<sup>5,6</sup>,  
8 Emanuele Montomoli<sup>2,3,7</sup>, Claudia Sala<sup>1†</sup>, Giuseppe Ippolito<sup>4\*</sup>, Rino Rappuoli<sup>1,8,\*</sup>

9  
10 <sup>1</sup>Monoclonal Antibody Discovery (MAD) Lab, Fondazione Toscana Life Sciences, Siena, Italy

11 <sup>2</sup>VisMederi S.r.l, Siena, Italy

12 <sup>3</sup>VisMederi Research S.r.l., Siena, Italy

13 <sup>4</sup>National Institute for Infectious Diseases Lazzaro Spallanzani, IRCCS, Rome, Italy

14 <sup>5</sup>Department of Medical Biotechnologies, University of Siena, Siena, Italy

15 <sup>6</sup>Department of Specialized and Internal Medicine, Tropical and Infectious Diseases Unit,  
16 University Hospital of Siena, Siena, Italy

17 <sup>7</sup>Department of Molecular and Developmental Medicine, University of Siena, Siena, Italy

18 <sup>8</sup>Faculty of Medicine, Imperial College, London, United Kingdom

19 <sup>9</sup>Department of Biotechnology, chemistry and pharmacy, University of Siena, Siena, Italy

20 <sup>10</sup>University of Turin, Turin, Italy

21 <sup>11</sup>Tumour Immunology Unit, Fondazione Toscana Life Sciences, Siena, Italy

22  
23 †These authors contributed equally in sample processing and patients enrolment respectively.

24 \*To whom correspondence should be addressed: Dr. Rino Rappuoli [r.rappuoli@imperial.ac.uk](mailto:r.rappuoli@imperial.ac.uk) and  
25 Dr. Giuseppe Ippolito [giuseppe.ippolito@inmi.it](mailto:giuseppe.ippolito@inmi.it)

26  
27 **One Sentence Summary:** Neutralizing human monoclonal antibodies isolated from Covid-19  
28 convalescent patients for therapeutic and prophylactic interventions.

29

30 **ABSTRACT**

31 In the absence of approved drugs or vaccines, there is a pressing need to develop tools for therapy  
32 and prevention of Covid-19. Human monoclonal antibodies have very good probability of being  
33 safe and effective tools for therapy and prevention of SARS-CoV-2 infection and disease. Here we  
34 describe the screening of PBMCs from seven people who survived Covid-19 infection to isolate  
35 human monoclonal antibodies against SARS-CoV-2. Over 1,100 memory B cells were single-cell  
36 sorted using the stabilized prefusion form of the spike protein and incubated for two weeks to allow  
37 natural production of antibodies. Supernatants from each cell were tested by ELISA for spike  
38 protein binding, and positive antibodies were further tested for neutralization of spike binding to  
39 receptor(s) on Vero E6 cells and for virus neutralization *in vitro*. From the 1,167 memory B specific  
40 for SARS-CoV-2, we recovered 318 B lymphocytes expressing human monoclonals recognizing the  
41 spike protein and 74 of these were able to inhibit the binding of the spike protein to the receptor.  
42 Finally, 17 mAbs were able to neutralize the virus when assessed for neutralization *in vitro*. Lead  
43 candidates to progress into the drug development pipeline will be selected from the panel of  
44 neutralizing antibodies identified with the procedure described in this study.

45

## 46 INTRODUCTION

47 The impact of the SARS-CoV-2 pandemic, with more than 3.5 million cases, 250,000 deaths and  
48 more than 25 million people unemployed in the United States alone, is unprecedented. This first  
49 wave of infection is likely to be followed by additional waves in the next few years, until herd  
50 immunity, acquired by vaccination or by infection, will constrain the circulation of the virus. It is  
51 therefore imperative to develop therapeutic and preventive tools to face the next waves of SARS-  
52 CoV-2 infections as soon as possible. Among the many therapeutic options available, human  
53 monoclonal antibodies (mAbs) are the ones that can be developed in the shortest period of time. In  
54 fact, the extensive clinical experience with the safety of more than 50 commercial mAbs approved  
55 to treat cancer, inflammatory and autoimmune disorders provides high confidence on their safety.  
56 These advantages combined with the urgency of the SARS-CoV-2 pandemic, support and justify an  
57 accelerated regulatory pathway. In addition, the long industrial experience in developing and  
58 manufacturing mAbs decreases the risks usually associated with the technical development of  
59 investigational products. Finally, the incredible technical progress in the field allows to shorten the  
60 conventional timelines and go from discovery to proof of concept trials in 5-6 months (1). Indeed,  
61 in the case of Ebola, mAbs were the first therapeutic intervention recommended by the World  
62 Health Organization (WHO) and they were developed faster than vaccines or other drugs (2).

63 The SARS-CoV-2 spike glycoprotein (S-protein) has a pivotal role in viral pathogenesis and it is  
64 considered the main target to elicit potent neutralizing antibodies and the focus for the development  
65 of therapeutic and prophylactic tools against this virus (3, 4). Indeed, SARS-CoV-2 entry into host  
66 cells is mediated by the interaction between S-protein and the human angiotensin converting  
67 enzyme 2 (ACE2) (3, 5). The S-protein is a trimeric class I viral fusion protein which exists in a  
68 metastable prefusion conformation and in a stable postfusion state. Each S-protein monomer is  
69 composed of two distinct regions, the S1 and S2 subunits. Structural rearrangement occurs when the  
70 receptor binding domain (RBD) present in the S1 subunit binds to the host cell membrane. This

71 interaction destabilizes the prefusion state of the S-protein triggering the transition into the  
72 postfusion conformation which in turn results in the ingress of the virus particle into the host cell  
73 (6). Single-cell RNA-seq analyses to evaluate the expression levels of ACE2 in different human  
74 organs have shown that SARS-CoV-2, through the S-protein, can invade human cells in different  
75 major physiological systems including the respiratory, cardiovascular, digestive and urinary  
76 systems, thus enhancing the possibility of spreading and infection (7).

77 To identify potent mAbs against SARS-CoV-2 we isolated over a 1,100 S-protein specific-memory  
78 B cells derived from seven Covid-19 convalescent donors. As the S-protein RBD domain is mainly  
79 exposed when this glycoprotein is in its prefusion state (6), we screened naturally produced mAbs  
80 against either the S1/S2 subunits and the S-protein trimer stabilized in its prefusion conformation  
81 (6). This strategy allows us to identify mAbs able to recognize linear epitopes as well as highly  
82 neutralizing trimer specific regions on the S-protein surface. The potent neutralizing effect of trimer  
83 specific mAbs has already been shown for other pathogens including the respiratory syncytial virus  
84 (RSV) (8, 9).

85 In this paper we report the identification of a panel of 318 mAbs from which we plan to select lead  
86 candidates for clinical development.

87

## 88 **RESULTS**

### 89 **SARS-CoV2 induces a strong antibody response in patients contracting infection**

90 Patients recovered from SARS-CoV-2 infection were enrolled in two ongoing clinical studies based  
91 in Rome, Italy (National Institute for Infectious Diseases, IRCCS, Lazzaro Spallanzani) and Siena,  
92 Italy (Azienda Ospedaliera Universitaria Senese). We firstly examined whether these patients had  
93 anti-SARS-CoV-2 S-protein antibodies. Plasma samples were evaluated by enzyme linked  
94 immunosorbent assay (ELISA), to assess the polyclonal response to the S-protein trimer, and by  
95 their ability to neutralize the binding of the spike protein to Vero E6 cell (neutralization of binding  
96 or NOB assay) and for their ability to neutralize the cytopathic effect caused by SARS-CoV-2  
97 infection *in vitro*. Results shown in Table 1 and Figure 1 show that among the seven donors  
98 included in this study, six were able to produce high titers of SARS-CoV-2 S-protein specific  
99 antibodies and in particular donors R-042, R-122 and R-188 showed the highest virus neutralizing  
100 titers. Only one patient (R-276) mounted low anti-Spike polyclonal response (Fig. 1A-B).  
101 Interestingly, despite no statistically significant correlation was observed when Pearson correlation  
102 analysis was performed, it is possible to observe a trend of correlation between S-protein binding,  
103 NOB titer and neutralization titer, suggesting that an abundant response against the S-protein trimer  
104 in its prefusion conformation may be indicative of immunity against SARS-CoV-2 (Fig. 1C-D). A  
105 bigger dataset may be needed to support this observation.

106

### 107 **Isolation of naturally induced S-protein specific antibodies from SARS-CoV-2 convalescent** 108 **patients**

109 To retrieve mAbs specific for SARS-CoV-2 S-protein, peripheral blood mononuclear cells  
110 (PBMCs) from the seven convalescent patients enrolled in this study were collected and stained  
111 with fluorescent labeled S-protein trimer to identify antigen specific memory B cells (MBCs). The  
112 gating strategy described in Fig. 2 was used to single cell sort into 384-well plates IgG<sup>+</sup> and IgA<sup>+</sup>

113 MBCs binding to the SARS-CoV-2 S-protein trimer in its prefusion conformation. A total of 1,167  
114 S-protein-binding MBCs were successfully retrieved with frequencies ranging from 0,17% to  
115 1,41% (Table 2). Following the sorting procedure, S-protein<sup>+</sup> MBCs were incubated over a layer of  
116 3T3-CD40L feeder cells in the presence of IL-2 and IL-21 stimuli for two weeks to allow natural  
117 production of immunoglobulins (10). Subsequently, MBC supernatants containing IgG or IgA were  
118 tested for their ability to bind either the SARS-CoV-2 S-protein S1 + S2 subunits (Fig. 3A) or  
119 trimer in its prefusion conformation (Fig. 3B) by enzyme linked immunosorbent assay (ELISA). A  
120 panel of 318 mAbs specific for the SARS-CoV-2 S-protein were identified showing a broad range  
121 of signal intensities (Table 2 and Fig. 3).

122

### 123 **Functional characterization of S-protein specific mAbs against SARS-CoV-2**

124 Of the 318 supernatants containing S-protein specific mAbs, 265 were screened *in vitro* for their  
125 ability to block the binding of the S-protein to Vero E6 cell receptors (Table 2 and Fig. 4A) and for  
126 their neutralization activity against the SARS-CoV-2 virus (Fig. 5A). In the NOB assay, 74 of the  
127 265 tested (28%) S-protein specific mAbs were able to neutralize the antigen/receptor binding  
128 showing a broad array of neutralization potency ranging from 52% to over 90% (Fig. 4B). In the  
129 viral neutralization assay, supernatants containing naturally produced IgG or IgA were tested for  
130 their ability to protect the layer of Vero E6 cells from the cytopathic effect triggered by SARS-  
131 CoV-2 infection (Fig. 5A). When mAbs were able to protect Vero E6 from infection, i.e. showing  
132 neutralization capacity against SARS-CoV-2, no cytopathic effect was observed (Fig. 5B, bottom-  
133 left box). On the contrary, when mAbs were not able to prevent infection, cytopathic effect on Vero  
134 E6 was clearly visible (Fig. 5B, bottom-right box). Out of the 265 mAbs tested in this study, a panel  
135 of 17 mAbs neutralized the virus and prevented infection of Vero E6 (Table 2).

136

137 **DISCUSSION**

138 Human monoclonal antibodies are an industrially mature technology with more than 50 products  
139 already approved in the field of cancer, inflammation and autoimmunity. The well-established  
140 safety profile and the large experience for their development, make mAbs ideal candidates for rapid  
141 development especially in epidemic and pandemic settings. So far mAbs have rarely been used in  
142 the field of infectious diseases, mostly because the large quantities needed for therapy made them  
143 not cost effective. However, in recent years, the incredible technological progress to isolate and  
144 screen memory B cells made possible to identify highly potent neutralizing mAbs and to further  
145 improve their potency of several orders of magnitude through established engineering procedures.  
146 This possibility resulted into a decreased amount of antibodies necessary for therapy thus making  
147 non-intravenous delivery of potent neutralizing mAbs possible. Several candidates are presently  
148 under development in the field of HIV, pandemic influenza, RSV and many other infectious  
149 diseases (11). Perhaps the most striking demonstration of the power of mAbs for emerging  
150 infections came from the Ebola experience. In this case rapidly developed potent mAbs were among  
151 the first drugs to be tested in the Ebola outbreak and showed remarkable efficacy in preventing  
152 mortality (2). Given the remarkable efficacy of this intervention, potent mAbs became the first, and  
153 so far the only, drug to be recommended for Ebola by the WHO.

154 In the case of SARS-CoV-2, where so far we do not have any effective therapeutic nor prophylactic  
155 interventions, mAbs have the possibility to become one of the first drugs that can be used for  
156 immediate therapy of any patient testing positive for the virus, and even to provide immediate  
157 protection from infection in high risk populations. Preliminary evidences showed that plasma from  
158 infected people improves the outcome of patients with severe disease, therefore it is highly possible  
159 that a therapeutic and/or prophylactic mAb-based intervention can be highly effective (12).  
160 Furthermore, vaccination strategies inducing neutralizing antibodies have shown to protect non-

161 human primates from infection (13). These results further stress the importance of mAbs as a  
162 measure to counterattack SARS-CoV-2 infection and to constrain its circulation.

163 In this work we addressed the question of whether mAbs recognizing SARS-CoV-2 can be  
164 recovered from memory B cells of people who survived Covid-19 and whether some of them are  
165 able to neutralize the virus. Our data show that SARS-CoV-2 specific mAbs can be successfully  
166 isolated from most convalescent donors even if the frequency of S-protein specific memory B cells  
167 is highly variable among them. In addition, approximately 28 % of isolated mAbs were able to  
168 inhibit the binding of the S-protein to the receptor(s) on Vero E6cells. Finally a fraction of isolated  
169 mAbs (N=17) were able to effectively neutralize SARS-CoV-2 with high potency when tested *in*  
170 *vitro*. These data suggest that the method we implemented allows us to successfully retrieve mAbs  
171 with potent neutralizing activity against SARS-CoV-2 and we plan to select the most promising  
172 candidate(s) for drug development. Lead candidates will be further tested for the ability to generate  
173 resistant viruses and for the ability to induce antibody-dependent disease enhancement in  
174 appropriate models.

175



## 176 **MATERIALS & METHODS**

### 177 **Enrollment of SARS-COV-2 convalescent donors and human sample collection**

178 This work results from a collaboration with the National Institute for Infectious Diseases, IRCCS –  
179 Lazzaro Spallanzani Rome (IT) and Azienda Ospedaliera Universitaria Senese, Siena (IT) that  
180 provided samples from SARS-CoV-2 convalescent donors who gave their written consent. The  
181 study was approved by local ethics committees (Parere 18\_2020 in Rome and Parere 17065 in  
182 Siena) and conducted according to good clinical practice in accordance with the declaration of  
183 Helsinki (European Council 2001, US Code of Federal Regulations, ICH 1997). This study was  
184 unblinded and not randomized.

185

### 186 **Human peripheral blood mononuclear cells (PBMCs) isolation from SARS-CoV-2** 187 **convalescent donors**

188 Peripheral blood mononuclear cells (PBMCs) were isolated from heparin treated whole blood by  
189 density gradient centrifugation (Lympholyte-H; Cederlane). After separation, PBMC were: i) frozen  
190 in liquid nitrogen at concentration of  $10 \times 10^6$  PBMC/vial using 10% DMSO in heat-inactivated  
191 fetal bovine serum, (FBS) or ii) resuspended in RPMI 1640 (EuroClone) supplemented with 10%  
192 FBS (EuroClone), 2 mmol/L L-glutamine, 10 mmol and with 2 mmol/L penicillin, and 50 µg/mL  
193 streptomycin (EuroClone). Cells were cultured for 18 hour at 37°C with 5% CO<sub>2</sub>. Blood samples  
194 were screened for SARS-CoV-2 RNA and for antibodies against HIV, HBV and HCV.

195

### 196 **Expression and purification of SARS-CoV-2 S-protein prefusion trimer**

197 These expression vector coding for prefusion S ectodomain (kindy gift of Dr. Jason Mc Lellan) was  
198 used to transiently transfect Expi293F cells (Thermo Fisher #A14527) using Expifectamine  
199 (Thermo Fisher # A14525). Protein was purified from filtered cell supernatants using NiNTA resin  
200 (GE Healthcare #11-0004-58), eluted with 250mM Imidazole (Sigma Aldrich #56750), dialyzed  
201 against PBS, and then stored at 4°C prior to use.

202

### 203 **Single cell sorting of SARS-CoV-2 S-protein<sup>+</sup> memory B cells**

204 Human peripheral blood mononuclear cells (PBMCs) from SARS-CoV-2 convalescent donors were  
205 stained with Live/Dead Fixable Aqua (Invitrogen; Thermo Scientific) in 100  $\mu$ L final volume  
206 diluted 1:500 at room temperature (RT). After 20 min incubation cells were washed with phosphate  
207 buffered saline (PBS) and unspecific bindings were saturated with 50  $\mu$ L of 20% rabbit serum in  
208 PBS. Following 20 min incubation at 4°C cells were washed with PBS and stained with SARS-  
209 CoV-2 S-protein labeled with Strep-Tactin®XT DY-488 (iba-lifesciences cat# 2-1562-050) for 30  
210 min at 4°C. After incubation the following staining mix was used CD19 V421 (BD cat# 562440),  
211 IgM PerCP-Cy5.5 (BD cat# 561285), CD27 PE (BD cat# 340425) IgD-A700 (BD cat# 561302),  
212 CD3 PE-Cy7 (BioLegend cat# 300420), CD14 PE-Cy7 (BioLegend cat# 301814), CD56 PE-Cy7  
213 (BioLegend cat# 318318) and cells were incubated at 4°C for additional 30 min. Stained MBCs  
214 were single cell-sorted with a BD FACSAria III (BD Biosciences) into 384 well plates containing  
215 3T3-CD40L feeder cells and were incubated with IL-2 and IL-21 for 14 days as previously  
216 described (10).

217

### 218 **ELISA assay with S1 and S2 subunits of SARS-CoV-2 S-protein**

219 The presence of S1- and S2-binding antibodies in culture supernatants of monoclonal S-protein-  
220 specific memory B cells was assessed by means of an ELISA assay implemented with the use of a  
221 commercial kit (ELISA Starter Accessory Kit, Catalogue No. E101; Bethyl Laboratories,  
222 Montgomeri, TX, USA). Briefly, 384-well flat-bottom microtiter plates (Nunc MaxiSorp 384-well  
223 plates; Sigma-Aldrich) were coated with 25  $\mu$ l/well of antigen (1:1 mix of S1 and S2 subunits, 1  
224  $\mu$ g/ml each; The Native Antigen Company, Oxford, United Kingdom) diluted in coating buffer  
225 (0.05 M carbonate-bicarbonate solution, pH 9.6), and incubated overnight at 4°C. The plates were  
226 then washed three times with 100  $\mu$ l/well washing buffer (50mM Tris Buffered Saline (TBS) pH  
227 8.0, 0.05% Tween-20) and saturated with 50  $\mu$ l/well blocking buffer containing Bovine Serum

228 Albumin (BSA) (50mM TBS pH 8.0, 1% BSA, 0.05% Tween-20) for 1 hour (h) at 37°C. After  
229 further washing, samples diluted 1:5 in blocking buffer were added to the plate. Blocking buffer  
230 was used as a blank. After an incubation of 1 h at 37°C, the plates were washed and incubated with  
231 25 µl/well secondary antibody (horseradish peroxidase (HRP)-conjugated goat anti-human IgG-Fc  
232 Fragment polyclonal antibody, diluted 1:10,000 in blocking buffer, Catalogue No. A80-104P;  
233 (Bethyl Laboratories, Montgomery, TX, USA) for 1 h at 37°C. After three washes, 25 µl/well TMB  
234 One Component HRP Microwell Substrate (Bethyl Laboratories, Montgomery, TX, USA) was  
235 added and incubated 10–15 minutes at RT in the dark. Color development was terminated by  
236 addition of 25 µl/well 0.2 M H<sub>2</sub>SO<sub>4</sub>. Absorbance was measured at 450 nm in a Varioskan Lux  
237 microplate reader (Thermo Fisher Scientific). The threshold for sample positivity was set at twice  
238 the OD of the blank.

239

#### 240 **ELISA assay with SARS-COV-2 S-protein prefusion trimer**

241 ELISA assay was used to detect SARS-CoV-2 S-protein specific mAbs and to screen plasma from  
242 SARS-CoV-2 convalescent donors. 384 well plates (Nunc MaxiSorp 384 well plates; Sigma  
243 Aldrich) were coated with 3µg/mL of streptavidin diluted in PBS and incubated at RT overnight.  
244 Plates were then coated with SARS-CoV-2 S-protein at 3µg/mL and incubated for 1h at room  
245 temperature. 50 µL/well of saturation buffer (PBS/BSA 1%) was used to saturate unspecific binding  
246 and plates were incubated at 37°C for 1h without CO<sub>2</sub>. Supernatants were diluted 1:5 in PBS/BSA  
247 1%/Tween20 0,05% in 25 µL/well final volume and incubated for 1h at 37°C without CO<sub>2</sub>. 25  
248 µL/well of alkaline phosphatase-conjugated goat anti-human IgG (Sigma-Aldrich) and IgA  
249 (Jackson Immuno Research) were used as secondary antibodies. In addition, twelve two-fold serial  
250 dilutions of plasma from SARS-CoV-2 infected patients were analyzed in duplicate. Plasma  
251 samples were diluted in PBS/BSA 1%/Tween20 0,05% (25 µL/well final volume; Starting Dilution  
252 1:80) and incubated for 1h at 37°C without CO<sub>2</sub>. Next, 25 µL/well of alkaline phosphatase-  
253 conjugated goat anti-human IgG (Sigma-Aldrich) was added for 1h at 37°C without CO<sub>2</sub>. Wells

254 were washed three times between each step with PBS/BSA 1%/Tween20 0,05%. PNPP (p-  
255 nitrophenyl phosphate) (Thermo Fisher) was used as soluble substrate to detect SARS-CoV-2 S-  
256 protein specific monoclonal antibodies and the final reaction was measured by using the Varioskan  
257 Lux Reader (Thermo Fisher Scientific) at a wavelength of 405 nm. Samples were considered as  
258 positive if optical density at 405 nm (OD<sub>405</sub>) was two times the blank.

259

## 260 **SARS-CoV-2 virus and cell infection**

261 African green monkey kidney cell line Vero E6 cells (American Type Culture Collection [ATCC]  
262 #CRL-1586) were cultured in Dulbecco's Modified Eagle's Medium (DMEM) - High Glucose  
263 (Euroclone, Pero, Italy) supplemented with 2 mM L- Glutamine (Lonza, Milano, Italy), penicillin  
264 (100 U/mL) - streptomycin (100 µg/mL) mixture (Lonza, Milano, Italy) and 10% Foetal Bovine  
265 Serum (FBS) (Euroclone, Pero, Italy). Cells were maintained at 37°C, in a 5% CO<sub>2</sub> humidified  
266 environment and passaged every 3-4 days.

267 Wild type SARS CoV-2 2019 (2019-nCoV strain 2019-nCov/Italy-INMI1) virus was purchased  
268 from the European Virus Archive goes Global (EVAg, Spallanzani Institute, Rome). For virus  
269 propagation, sub-confluent Vero E6 cell monolayers were prepared in T175 flasks (Sarstedt)  
270 containing supplemented D-MEM high glucose medium. For titration and neutralization tests of  
271 SARS-CoV-2, Vero E6 were seeded in 96-well plates (Sarstedt) at a density of  $1,5 \times 10^4$  cells/well  
272 the day before the assay.

273

## 274 **Neutralization of Binding (NOB) Assay**

275 To study the binding of the Covid-19 Spike protein to cell-surface receptor(s) we developed an  
276 assay to assess recombinant Spike protein specific binding to target cells and neutralization thereof.  
277 To this aim the stabilized Spike protein was coupled to Streptavidin-PE (eBioscience # 12-4317-87,  
278 ThermoFisher) for 30min at 4°C. and then incubated with VERO E6 cells and binding was assessed

279 by flow cytometry. The stabilized Spike protein bound VERO E6 cells with high affinity (data not  
280 shown).

281 To assess the content of neutralizing antibodies in sera or B-cell culture supernatants, two  
282 microliters of nCoV19 Spike-Streptavidin-PE at 15-30 $\mu$ g/ml in PBS-1%FCS were mixed with two  
283 microliters of various dilutions of sera or B-cell culture supernatants in U bottom 96well plates.  
284 After incubation at 37°C for 1 hr, 25x10<sup>3</sup> Vero E6 cells suspended in two microliters of PBS 1%  
285 FCS were added and incubated for additional 1 hr at 4°C. Non-bound protein and antibodies were  
286 removed and cell-bound PE-fluorescence was analyzed with a FACScantoII flow cytometer  
287 (Becton Dickinson). Data were analyzed using the FlowJo data analysis software package  
288 (TreeStar, USA). The specific neutralization was calculated as follows: NOB (%) = 1 – (Sample  
289 MFI value – background MFI value) / (Negative Control MFI value – background MFI value).

290

### 291 **Viral propagation and titration**

292 The SARS-CoV-2 virus was propagated in Vero E6 cells cultured in DMEM high Glucose  
293 supplemented with 2% FBS, 100 U/mL penicillin, 100  $\mu$ g/mL streptomycin. Cells were seeded at a  
294 density of 1x10<sup>6</sup> cells/mL in T175 flasks and incubated at 37°C, 5% CO<sub>2</sub> for 18-20 hours. The sub-  
295 confluent cell monolayer was then washed twice with sterile Dulbecco's phosphate buffered saline  
296 (DPBS). Cells were inoculated with 3.5 ml of the virus properly diluted in DMEM 2% FBS at a  
297 multiplicity of infection (MOI) of 0.001, and incubated for 1h at 37°C in a humidified environment  
298 with 5% CO<sub>2</sub>. At the end of the incubation, 50 mL of DMEM 2% FBS were added to the flasks.  
299 The infected cultures were incubated at 37°C, 5% CO<sub>2</sub> and monitored daily until approximately 80-  
300 90% of the cells exhibited cytopathic effect (CPE). Culture supernatants were then collected,  
301 centrifuged at +4°C at 1,600 rpm for 8 minutes to allow removal of cell debris, aliquoted and  
302 stored at -80°C as the harvested viral stock. Viral titers were determined in confluent monolayers of  
303 Vero E6 cells seeded in 96-well plates using a 50% tissue culture infectious dose assay (TCID<sub>50</sub>).  
304 Cells were infected with serial 1:10 dilutions (from 10<sup>-1</sup> to 10<sup>-11</sup>) of the virus and incubated at

305 37°C, in a humidified atmosphere with 5% CO<sub>2</sub>. Plates were monitored daily for the presence of  
306 SARS-CoV-2 induced CPE for 4 days using an inverted optical microscope. The virus titer was  
307 estimated according to Spearman-Kärber formula (14) and defined as the reciprocal of the highest  
308 viral dilution leading to at least 50% CPE in inoculated wells.

309

### 310 **Semi-quantitative live SARS-CoV-2-based neutralization assay**

311 To assess the neutralization titer of anti-SARS-CoV-2 plasma samples from Covid-19 convalescent  
312 donors, a semi-quantitative neutralization method was used. Plasma samples were heat-inactivated  
313 for 30 minutes at 56°C and 2-fold serially diluted starting from 1:10 to 1:2,560 dilution, then mixed  
314 with an equal volume of viral solution containing 100 TCID<sub>50</sub> of SARS-CoV-2 diluted in D-MEM  
315 high Glucose 2% FBS. After 1 hour incubation at 37°C, 5% CO<sub>2</sub>, 100 µl of the virus-plasma  
316 mixture at each dilution was passed to a cell plate containing a sub-confluent Vero E6 monolayer.  
317 Plates were incubated for 3 days at 37°C in a humidified environment with 5% CO<sub>2</sub>, then checked  
318 for development of CPE by means of an inverted optical microscope. The reciprocal of the highest  
319 plasma dilution that resulted in more than 50% inhibition of CPE was defined as the neutralization  
320 titer.

321

### 322 **Qualitative live SARS-CoV-2-based neutralization assay**

323 The neutralization activity of culture supernatants from monoclonal S-protein-specific memory B  
324 cells was evaluated by means of a qualitative live-virus based neutralization assay against a one-  
325 point dilution of the samples. Supernatants were mixed in a 1:3 ratio with a SARS-CoV-2 viral  
326 solution containing 25 TCID<sub>50</sub> of virus (final volume: 30 µl). After 1 hour incubation at 37°C, 5%  
327 CO<sub>2</sub>, 25 µl of each virus-supernatant mixture was added to the wells of a 96-well plate containing a  
328 sub-confluent Vero E6 monolayer. Following a 2-hours incubation at 37°C, the virus-serum mixture  
329 was removed and 100 µl of DMEM 2% FBS were added to each well. The plates were incubated  
330 for 3 days at 37°C in a humidified environment with 5% CO<sub>2</sub>, then examined for CPE by means of

331 an inverted optical microscope. Absence or presence of CPE was defined by comparison of each  
332 well with the positive control (plasma sample showing high neutralizing activity of SARS-CoV-2 in  
333 infected Vero E6) and negative control (human serum sample negative for SARS-CoV-2 in ELISA  
334 and neutralization assayl).  
335

336 **Author contribution**

337 Emanuele Andreano, Ida Paciello isolated single memory B cells and identified S-protein specific  
338 mAbs (cell sorting and ELISA).

339 Piero Pileri, Noemi Manganaro, Elisa Pantano performed NOB assay and produced recombinant  
340 spike porotein.

341 Giulia Piccini, Alessandro Manenti and Emanuele Montomoli performed ELISA and viral  
342 neutralization assay.

343 Marco Troisi, Fabiola Vacca, Concetta De Santi, Dario Cardamone, Anna Kabanova, contributed to  
344 the characterization of positive memory B cells

345 Emanuele Nicastri, Chiara Agrati, Concetta Castilletti, Francesca Montagnani, Arianna Emiliozzi,  
346 Massimiliano Fabbiani, Maria Rosaria Capobianchi, enrolled patients and isolated PBMCs.

347 Claudia Sala, Giuseppe Ippolito, Rino Rappuoli, Coordinated the project

348

349 **Conflict of interest statement**

350 RR is an employee of GSK group of companies.

351

352 **ACKNOWLEDGMENT**

353 We wish to thank Fondazione Toscana Life Sciences in the person of Dr. Fabrizio Landi and Dr. Andrea Paolini and all the  
354 administration for their incredible help and support. In particular we would like to thank Mr. Francesco Senatore, Mrs. Laura  
355 Canavacci and Mrs. Cinzia Giordano for their support in preparing all the documents needed for the ethical approval of the clinical  
356 studies started to carry out this project.

357 This work was possible thanks to the technology set up in our European Research Council (ERC) funded lab named vAMRes which  
358 allowed us to isolate mAbs from vaccinated and/or convalescent patients to tackle the global threat posed by antimicrobial resistance.

359 We wish to thank the National Institute for Infectious Diseases, IRCCS, Lazzaro Spallanzani Rome (IT) and the Azienda Ospedaliera  
360 Universitaria Senese, Siena (IT), for providing blood samples from Covid-19 convalescent donors under studies approved by local  
361 ethic committees. These studies are conducted under good clinical practice in accordance with the declaration of Helsinki. Donors  
362 have given their written consent to participate to this study. We also wish to thank all the nursing staff that chose to cooperate for  
363 blood withdrawal and all the donors that decided to participate to this study.



364 We would like to thank the whole GSK Vaccines Pre-clinical Evidence Generation and Assay – Immunology function led by Dr.  
365 Oretta Finco for their availability and support as well as Mrs. Simona Tavarini, Mrs. Chiara Sammiceli, Dr. Monia Bardelli, Dr.  
366 Michela Brazzoli, Dr. Elisabetta Frigimelica, Dr. Erica Borgogni and Dr. Elisa Faenzi for sharing their expertise, extreme availability  
367 and technical support. We would also like to thank Dr. Mariagrazia Pizza and Dr. Simone Pecetta for initial insightful advices and  
368 discussions on this project.

369 We would like to thank Dr. Jason McLellan and his team for generously providing the SARS-CoV-2 S-protein stabilized in its  
370 prefusion conformation used in this study. Furthermore, we would like to thank Dr. Daniel Wrapp and Dr. Nianshuang Wang for the  
371 precious information and suggestions.

372 We gratefully acknowledge the Collaborators Members of INMI COVID-19 study group: Maria Alessandra Abbonizio, Amina  
373 Abdeddaim, Fabrizio Albarello, Gioia Amadei, Alessandra Amendola, Mario Antonini, Tommaso Ascoli Bartoli, Francesco Baldini,  
374 Raffaella Barbaro, Bardhi Dorian, Barbara Bartolini, Rita Bellagamba, Martina Benigni, Nazario Bevilacqua, Gianlugi Biava,  
375 Michele Bibas, Licia Bordi, Veronica Bordoni, Evangelo Boumis, Marta Branca, Donatella Busso, Marta Camici, Paolo Campioni,  
376 Alessandro Capone, Cinzia Caporale, Emanuela Caraffa, Iaria Caravella, Fabrizio Carletti, Adriana Cataldo, Stefano Cerilli, Carlotta  
377 Cerva, Roberta Chiappini, Pierangelo Chinello, Carmine Ciaralli, Stefania Cicalini, Francesca Colavita, Angela Corpolongo,  
378 Massimo Cristofaro, Salvatore Curiale, Alessandra D’Abramo, Cristina Dantimi, Alessia De Angelis, Giada De Angelis, Maria  
379 Grazia De Palo, Federico De Zottis, Virginia Di Bari, Rachele Di Lorenzo, Federica Di Stefano, Gianpiero D’Offizi, Davide Donno,  
380 Francesca Faraglia, Federica Ferraro, Lorena Fiorentini, Andrea Frustaci, Matteo Fusetti, Vincenzo Galati, Roberta Gagliardini,  
381 Paola Gallì, Gabriele Garotto, Saba Gebremeskel Tekle, Maria Letizia Giancola, Filippo Giansante, Emanuela Giombini, Guido  
382 Granata, Maria Cristina Greci, Elisabetta Grilli, Susanna Grisetti, Gina Gualano, Fabio Iacomì, Giuseppina Iannicelli, Eleonora Lalle,  
383 Simone Lanini, Daniele Lapa, Luciana Lepore, Raffaella Libertone, Raffaella Lionetti, Giuseppina Liuzzi, Laura Loiacono, Andrea  
384 Lucia, Franco Lufrani, Manuela Macchione, Gaetano Maffongelli, Alessandra Marani, Luisa Marchioni, Raffaella Marconi, Andrea  
385 Mariano, Maria Cristina Marini, Micaela Maritti, Alessandra Mastrobattista, Giulia Matusali, Valentina Mazzotta, Paola Mencarini,  
386 Silvia Meschi, Francesco Messina, Annalisa Mondì, Marzia Montalbano, Chiara Montaldo, Silvia Mosti, Silvia Murachelli, Maria  
387 Musso, Pasquale Noto, Roberto Noto, Alessandra Oliva, Sandrine Ottou, Claudia Palazzolo, Emanuele Pallini, Fabrizio Palmieri,  
388 Carlo Pareo, Virgilio Passeri, Federico Pelliccioni, Antonella Petrecchia, Ada Petrone, Nicola Petrosillo, Elisa Pianura, Carmela  
389 Pinnetti, Maria Pisciotta, Silvia Pittalis, Agostina Pontarelli, Costanza Proietti, Vincenzo Puro, Paolo Migliorisi Ramazzini, Alessia  
390 Rianda, Gabriele Rinonapoli, Silvia Rosati, Martina Rueca, Alessandra Sacchi, Alessandro Sampaolesi, Francesco Sanasi, Carmen  
391 Santagata, Alessandra Scarabello, Silvana Scarcia, Vincenzo Schininà, Paola Scognamiglio, Laura Scorzolini, Giulia Stazi, Fabrizio  
392 Taglietti, Chiara Taibi, Roberto Tonnarini, Simone Topino, Francesco Vaia, Francesco Vairo, Maria Beatrice Valli, Alessandra  
393 Vergori, Laura Vincenzi, Ubaldo Visco-Comandini, Pietro Vittozzi, Mauro Zaccarelli.

394 This publication was supported by the “Centro Regionale Medicina di Precisione” and all the people who answered the call to fight  
395 with us the battle against SARS-CoV-2 and for their kind donations on the platform ForFunding  
396 (<https://www.forfunding.intesasanpaolo.com/DonationPlatform-ISP/nav/progetto/id/3380>).

397 This publication was supported by the European Virus Archive goes Global (EVAg) project, which has received funding from the  
398 European Union's Horizon 2020 research and innovation programme under grant agreement No 653316.  
399

400 **TABLE**

401 **Table 1. SARS-CoV-2 convalescent donors plasma analyses.** Plasma S-protein binding titers for  
402 each subject were measured by ELISA assays. Neutralization activity was detected by NOB and by  
403 neutralization of SARS-CoV-2 infection of Vero cells.

| Subject ID | Plasma S-protein Binding | Plasma Neutralization of binding (NOB) | Plasma Virus Neutralization |
|------------|--------------------------|----------------------------------------|-----------------------------|
| R-015      | 10240                    | >540                                   | 320                         |
| R-042      | 5120                     | >540                                   | 640                         |
| R-122      | 10240                    | >540                                   | 640                         |
| R-276      | 80                       | 180                                    | 10                          |
| R-188      | 10240                    | >540                                   | >2560                       |
| S-4        | 2560                     | ND                                     | ND                          |
| S-9        | 10240                    | ND                                     | ND                          |

409

410 **Table 2. SARS-CoV-2 convalescent donors S-protein specific MBCs analyses.** The Table  
411 reports the number of S-protein-specific MBCs that were sorted and screened (for binding by  
412 ELISA and for functionality by NOB and viral neutralization) for each subject enrolled in this  
413 study.

414

| Subject ID | Antigen Specific MBCs(%) | S-protein <sup>+</sup> MBCs Sorted | S-protein <sup>+</sup> mAbs (ELISA) | Neutralization of binding (NOB) | SARS-CoV-2 Neutralization |
|------------|--------------------------|------------------------------------|-------------------------------------|---------------------------------|---------------------------|
| R-015      | 1,01                     | 230                                | 18                                  | 3                               | 0                         |
| R-042      | 0,27                     | 39                                 | 3                                   | 1                               | 0                         |
| R-122      | 0,61                     | 5                                  | 2                                   | 0                               | 0                         |
| R-276      | 0,27                     | 66                                 | 4                                   | 2                               | 0                         |
| R-188      | 0,17                     | 324                                | 72                                  | 8                               | 4                         |
| S-4        | 1,41                     | 367                                | 158                                 | 60                              | 13                        |
| S-9        | 0,87                     | 136                                | 53                                  | ND                              | ND                        |
|            | <b>Total</b>             | <b>1,167</b>                       | <b>318</b>                          | <b>74</b>                       | <b>17</b>                 |

415  
416  
417  
418  
419

420 **FIGURES**

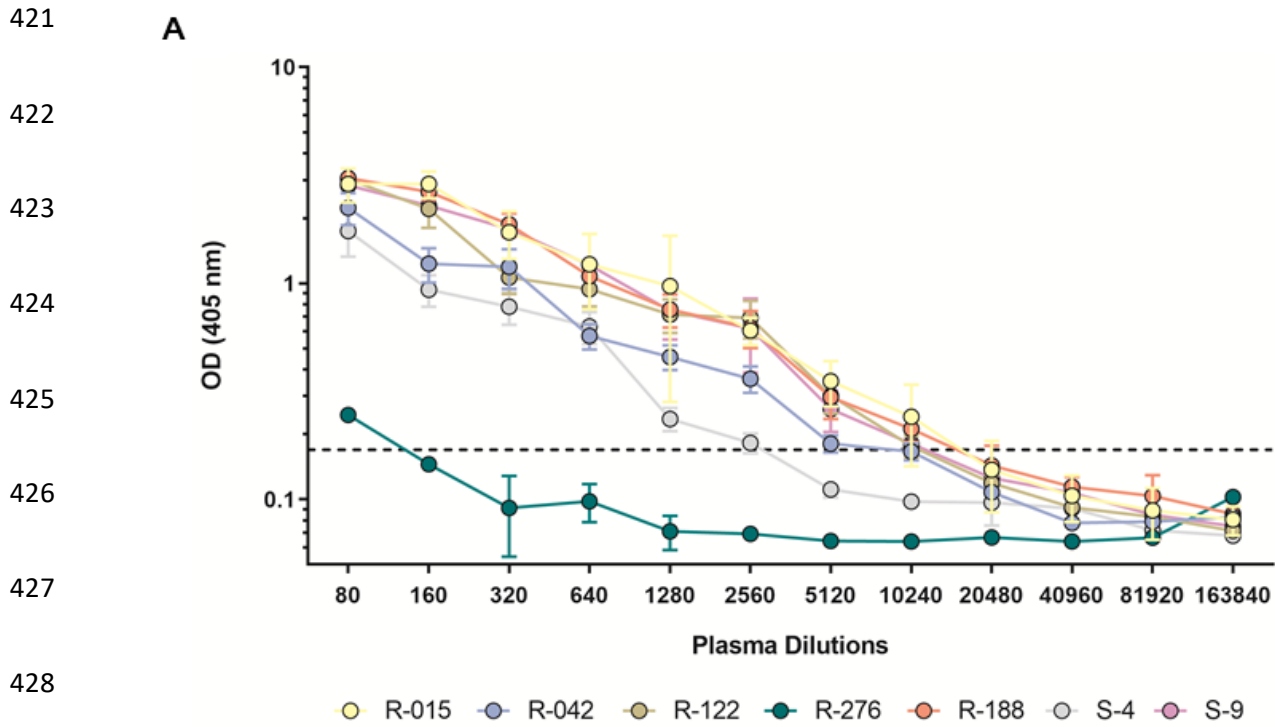

**B**

|      | R-015 | R-042 | R-122 | R-276 | R-188 | Cell Control | Virus Control |
|------|-------|-------|-------|-------|-------|--------------|---------------|
| 10   | -     | -     | -     | -     | -     | -            | +             |
| 20   | -     | -     | -     | +     | -     | -            | +             |
| 40   | -     | -     | -     | +     | -     | -            | +             |
| 80   | -     | -     | -     | +     | -     | -            | +             |
| 160  | -     | -     | -     | +     | -     | -            | +             |
| 320  | -     | -     | -     | +     | -     | -            | +             |
| 640  | +     | -     | -     | +     | -     | -            | +             |
| 1280 | +     | +     | +     | +     | -     | -            | +             |
| 2560 | +     | +     | +     | +     | -     | -            | +             |

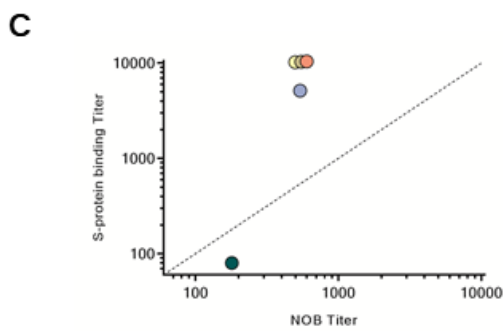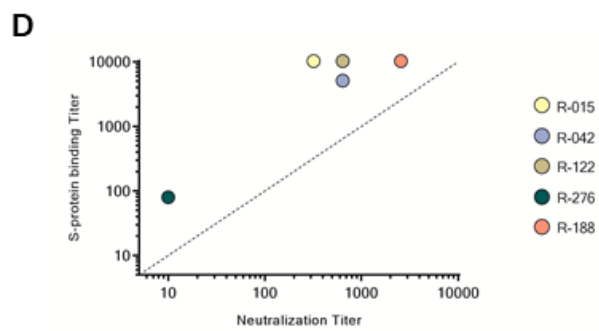

439 **Fig. 1. S-protein binding and neutralization titration of SARS-CoV-2 convalescent donors**  
440 **plasma.** (A) Plasma samples were two-fold diluted starting at 1:80 to test their ability to bind the S-  
441 protein trimer in its prefusion state by ELISA. Results were considered as positive when the OD<sub>405</sub>  
442 value was at least two times higher than the blank. (B) Plasma samples were two-fold diluted  
443 starting at 1:10 to test their ability to neutralize SARS-CoV-2 *in vitro*. Results were considered as  
444 positive when no cytopathic effect (-) was observed on Vero E6 cells . (C) The graph shows on the  
445 Y axis the Log<sub>10</sub> S-protein binding titer and the X axis the Log<sub>10</sub> NOB titer of plasma collected from  
446 Covid-19 convalescent patients. Donors R-015 and R-122 are not visible in the graph as their data  
447 overlap with those of donor R-188. (D) The graph shows on the Y axis the Log<sub>10</sub> S-protein binding  
448 titer and the X axis the Log<sub>10</sub> neutralization titer of plasma collected from Covid-19 convalescent  
449 patients.

450

451

452

453

454

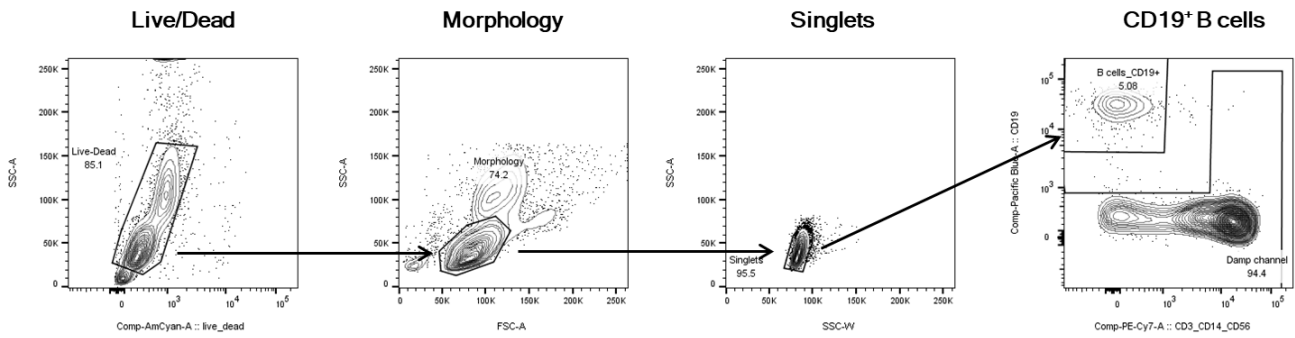

455

456

457

458

459

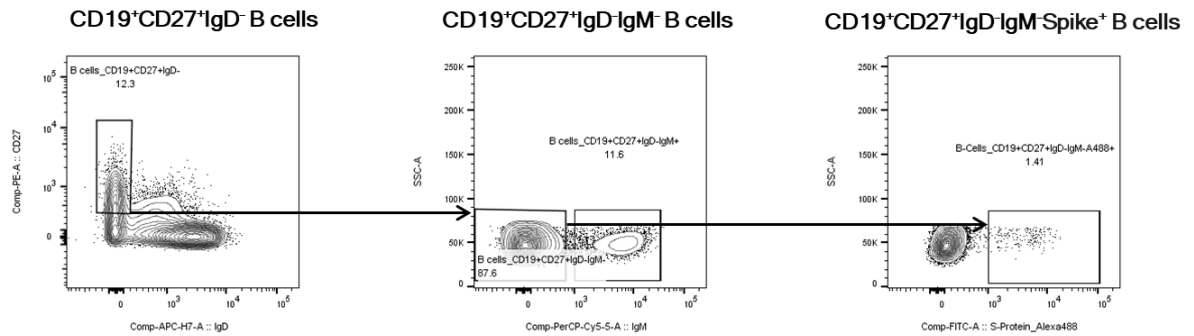

460

461

462

463

**Fig. 2. Gating strategy for S-protein specific MBC single cell sorting.** Starting from top left to the right panel, the gating strategy shows: Live/Dead; Morphology; Singlets; CD19<sup>+</sup> B cells; CD19<sup>+</sup>CD27<sup>+</sup>IgD<sup>-</sup>; CD19<sup>+</sup>CD27<sup>+</sup>IgD<sup>-</sup>IgM<sup>+</sup>; CD19<sup>+</sup>CD27<sup>+</sup>IgD<sup>-</sup>IgM<sup>+</sup>S-protein<sup>+</sup>B cells.

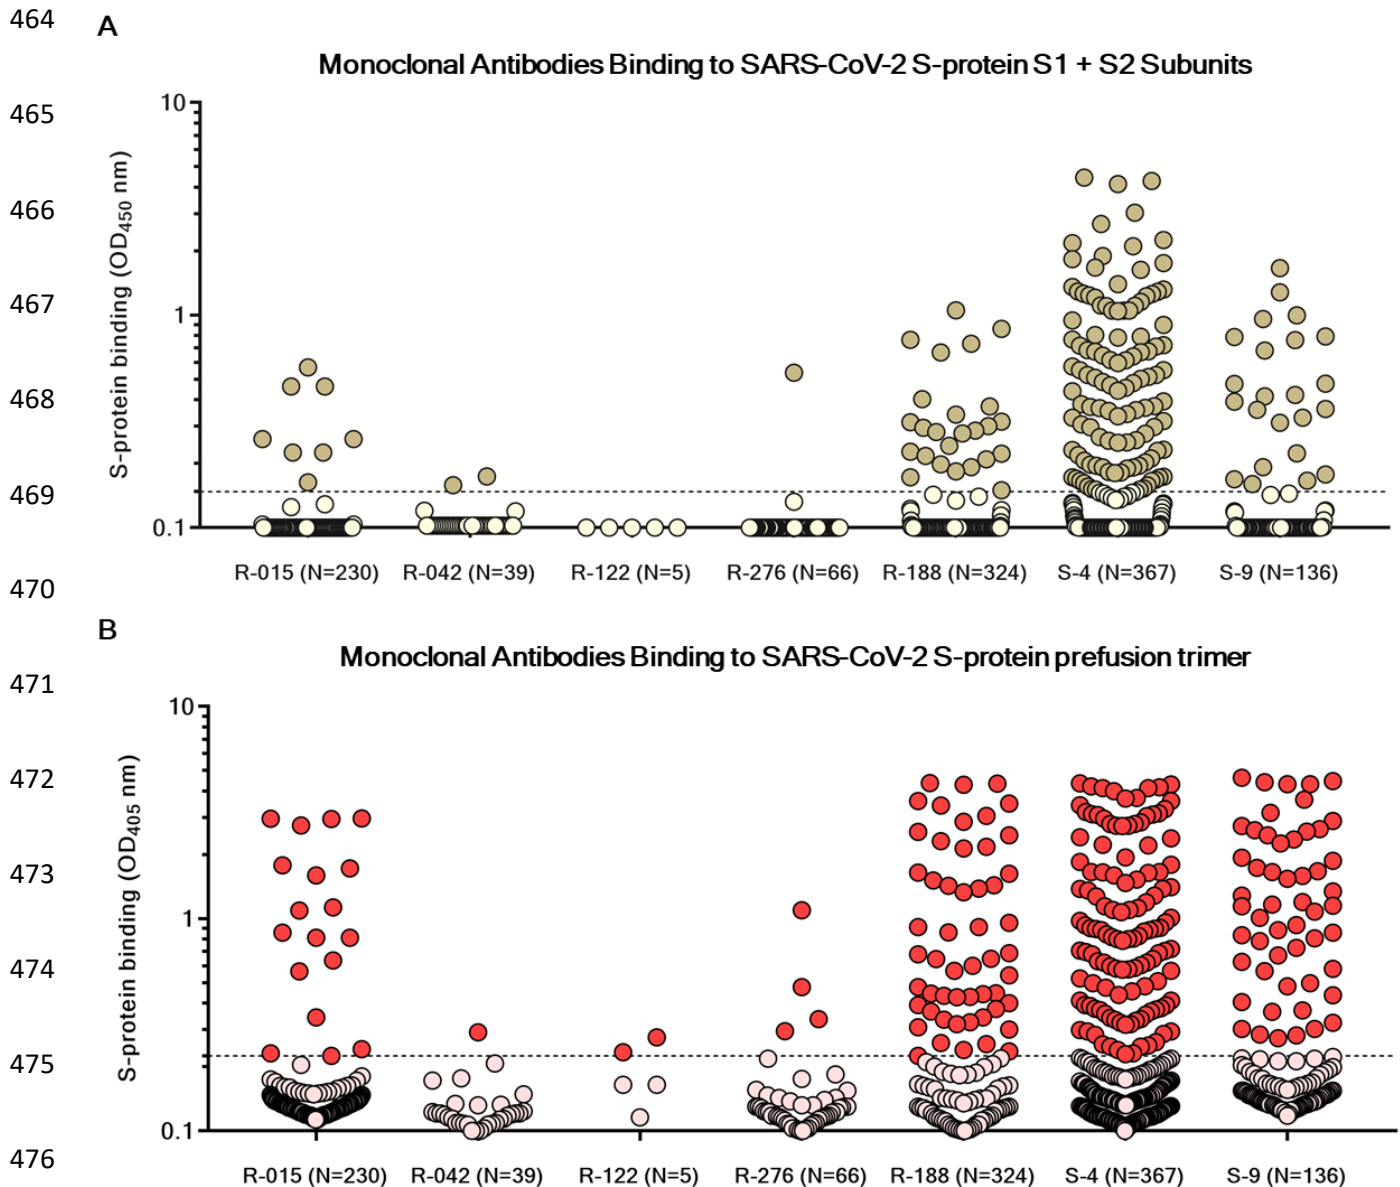



486 while pink dots represent mAbs which do not bind. Total number (N) of single cell sorted B cell  
487 supernatants screened for binding is also shown for each donor.

488

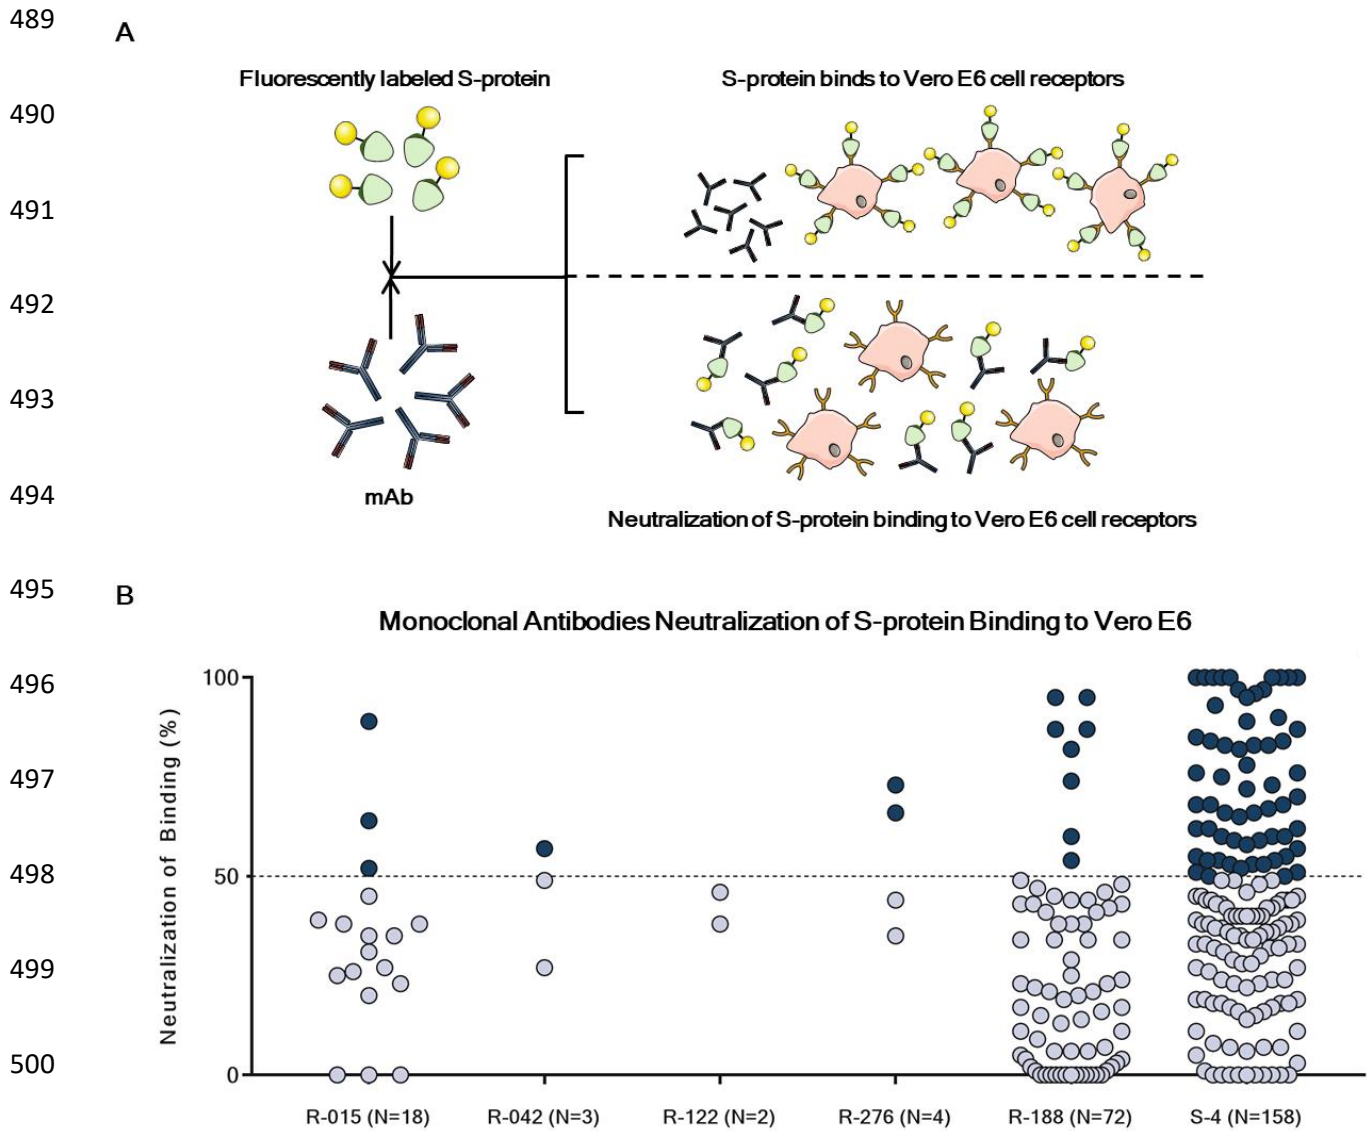

502 **Fig. 4. Neutralization of S-protein binding to Vero E6 cell receptors by S-protein specific**  
503 **mAbs.** (A) Schematic representation of the neutralization of binding (NOB) assay used to screen  
504 isolated S-protein specific mAbs for their ability to abrogate the interaction between SARS-CoV-  
505 2/Vero E6 receptors. (B) The graph shows supernatant tested by NOB assay. Threshold of positivity  
506 has been set as 50% of binding neutralization (dotted line). Dark blue dots represent mAbs able to  
507 neutralize the binding between SARS-CoV-2 and receptors on Vero E6 cells, while light blue dots  
508 represent non-neutralizing mAbs. The total number (N) of S-protein specific mAbs supernatants  
509 screened by NOB assay is shown for each donor

510

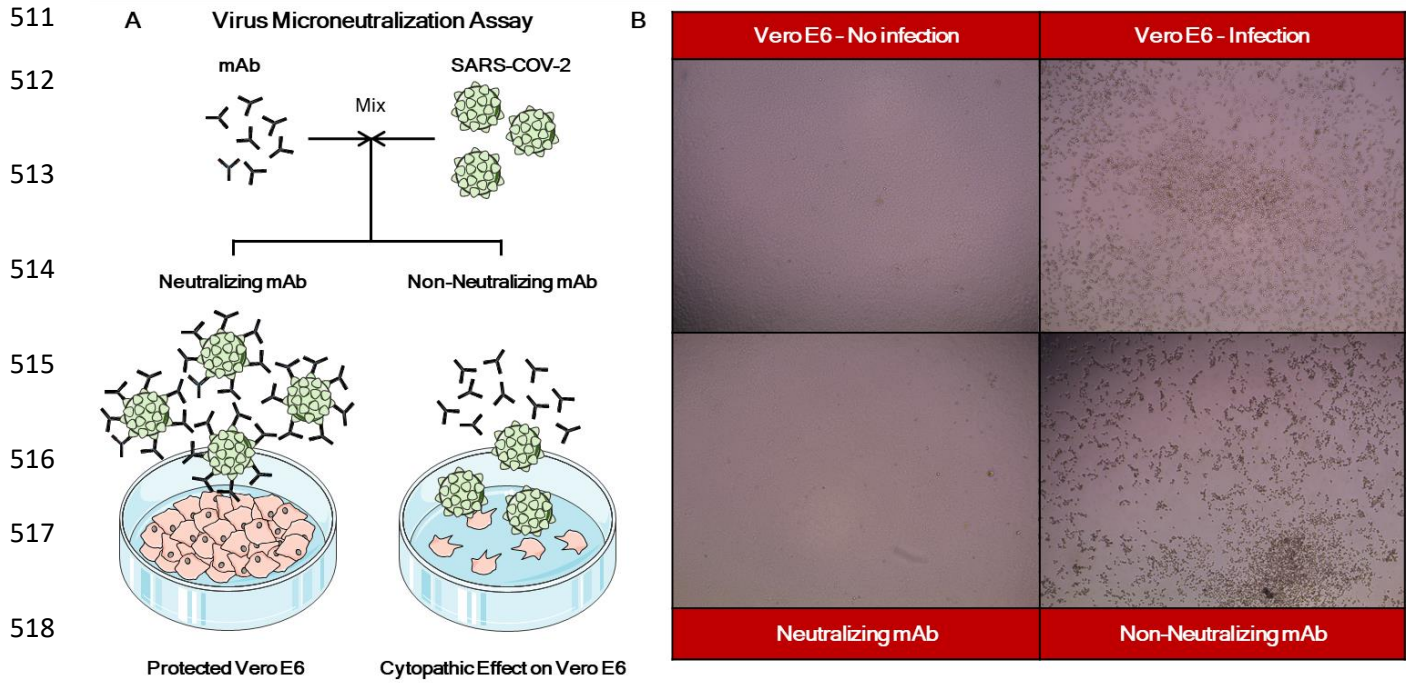

**Fig. 5. SARS-CoV-2 neutralization assay for S-protein specific mAbs.** (A) Schematic representation of the virus neutralization assay used in this study to assess functional activities of S-protein specific mAbs. (B) Representative microscope images that showing the cytopathic effect of SARS-CoV-2 or the protection protective efficacy of the screened supernatants on Vero E6 cells by screened mAbs.

526 **REFERENCES:**

- 527 1. B. Kelley, Developing therapeutic monoclonal antibodies at pandemic pace. *Nature biotechnology*,  
528 (2020).
- 529 2. K. Kupferschmidt, Successful Ebola treatments promise to tame outbreak. *Science (New York, N.Y.)*  
530 **365**, 628-629 (2019).
- 531 3. A. C. Walls, Y. J. Park, M. A. Tortorici, A. Wall, A. T. McGuire, D. Velesler, Structure, Function, and  
532 Antigenicity of the SARS-CoV-2 Spike Glycoprotein. *Cell* **181**, 281-292.e286 (2020).
- 533 4. M. Z. Tay, C. M. Poh, L. Renia, P. A. MacAry, L. F. P. Ng, The trinity of COVID-19: immunity,  
534 inflammation and intervention. *Nature reviews. Immunology*, (2020).
- 535 5. Q. Wang, Y. Zhang, L. Wu, S. Niu, C. Song, Z. Zhang, G. Lu, C. Qiao, Y. Hu, K. Y. Yuen, Q. Wang, H.  
536 Zhou, J. Yan, J. Qi, Structural and Functional Basis of SARS-CoV-2 Entry by Using Human ACE2. *Cell*,  
537 (2020).
- 538 6. D. Wrapp, N. Wang, K. S. Corbett, J. A. Goldsmith, C. L. Hsieh, O. Abiona, B. S. Graham, J. S.  
539 McLellan, Cryo-EM structure of the 2019-nCoV spike in the prefusion conformation. *Science (New*  
540 *York, N.Y.)* **367**, 1260-1263 (2020).
- 541 7. X. Zou, K. Chen, J. Zou, P. Han, J. Hao, Z. Han, Single-cell RNA-seq data analysis on the receptor  
542 ACE2 expression reveals the potential risk of different human organs vulnerable to 2019-nCoV  
543 infection. *Frontiers of medicine*, (2020).
- 544 8. J. A. Melero, V. Mas, J. S. McLellan, Structural, antigenic and immunogenic features of respiratory  
545 syncytial virus glycoproteins relevant for vaccine development. *Vaccine* **35**, 461-468 (2017).
- 546 9. B. S. Graham, Immunological goals for respiratory syncytial virus vaccine development. *Current*  
547 *opinion in immunology* **59**, 57-64 (2019).
- 548 10. J. Huang, N. A. Doria-Rose, N. S. Longo, L. Laub, C. L. Lin, E. Turk, B. H. Kang, S. A. Migueles, R. T.  
549 Bailer, J. R. Mascola, M. Connors, Isolation of human monoclonal antibodies from peripheral blood  
550 B cells. *Nature protocols* **8**, 1907-1915 (2013).
- 551 11. E. Andreano, A. Seubert, R. Rappuoli, Human monoclonal antibodies for discovery, therapy, and  
552 vaccine acceleration. *Current opinion in immunology* **59**, 130-134 (2019).

- 553 12. K. Duan, B. Liu, C. Li, H. Zhang, T. Yu, J. Qu, M. Zhou, L. Chen, S. Meng, Y. Hu, C. Peng, M. Yuan, J.  
554 Huang, Z. Wang, J. Yu, X. Gao, D. Wang, X. Yu, L. Li, J. Zhang, X. Wu, B. Li, Y. Xu, W. Chen, Y. Peng, Y.  
555 Hu, L. Lin, X. Liu, S. Huang, Z. Zhou, L. Zhang, Y. Wang, Z. Zhang, K. Deng, Z. Xia, Q. Gong, W. Zhang,  
556 X. Zheng, Y. Liu, H. Yang, D. Zhou, D. Yu, J. Hou, Z. Shi, S. Chen, Z. Chen, X. Zhang, X. Yang,  
557 Effectiveness of convalescent plasma therapy in severe COVID-19 patients. *Proceedings of the*  
558 *National Academy of Sciences of the United States of America* **117**, 9490-9496 (2020).
- 559 13. Q. Gao, L. Bao, H. Mao, L. Wang, K. Xu, M. Yang, Y. Li, L. Zhu, N. Wang, Z. Lv, H. Gao, X. Ge, B. Kan, Y.  
560 Hu, J. Liu, F. Cai, D. Jiang, Y. Yin, C. Qin, J. Li, X. Gong, X. Lou, W. Shi, D. Wu, H. Zhang, L. Zhu, W.  
561 Deng, Y. Li, J. Lu, C. Li, X. Wang, W. Yin, Y. Zhang, C. Qin, Rapid development of an inactivated  
562 vaccine for SARS-CoV-2. 2020.2004.2017.046375 (2020).
- 563 14. M. Kundi, One-hit models for virus inactivation studies. *Antiviral research* **41**, 145-152 (1999).
- 564
